# Supplementary material for: Identification of New Antimicrobial Peptides from Mediterranean Medical Plant Charybdis pancration (Steinh.) Speta
Source: PubMed Central journal article supplement (PMC7694139; doi:10.3390/antibiotics9110747), 2020-10-28
Supplement: antibiotics-09-00747-s001.pdf [file antibiotics-09-00747-s001.pdf]

## Supplementary Materials

### S1: Mass Spectrometry Analysis.

| N. | Description Protein (Acc. No.; Taxa)                                                | N.  | Peptide           | Score (-10lgP)    | Mass      | AA Length | ppm  | m/z      | z | RT (min) | Scan     |
|----|-------------------------------------------------------------------------------------|-----|-------------------|-------------------|-----------|-----------|------|----------|---|----------|----------|
| 1  | Ribosome-inactivating protein charybdisin (P84786; <i>C.panicum</i> )               | #1  | ILDISYNKNALQD     | 61.82             | 1505.7726 | 13        | 1    | 753.8943 | 2 | 32.03    | F1:7037  |
| 2  |                                                                                     | #2  | SEPVKLPQWMQND     | 71.62             | 1570.745  | 13        | 0.7  | 786.3803 | 2 | 34.24    | F2:10073 |
| 3  |                                                                                     | #3  | VDIANHFAN         | 67.31             | 1146.5458 | 10        | 0.6  | 574.2805 | 2 | 33.28    | F2:9627  |
| 4  |                                                                                     | #4  | ILDISYNKNALQDAVSK | 65.74             | 1891.005  | 17        | 0.5  | 631.3426 | 3 | 31.43    | F2:8731  |
| 5  |                                                                                     | #5  | LPQWMQNDLEKN      | 60.46             | 1514.7188 | 12        | -0.1 | 758.3666 | 2 | 33.24    | F1:7607  |
| 6  |                                                                                     | #6  | LEKNWVRFSS        | 57.24             | 1324.6927 | 10        | 0    | 663.3536 | 2 | 33.26    | F1:7615  |
| 7  |                                                                                     | #7  | VDIANHFANLE       | 57.6              | 1388.6724 | 12        | 0.2  | 695.3436 | 2 | 37.02    | F2:11377 |
| 8  |                                                                                     | #8  | DILDISYNKNALQD    | 46.72             | 1620.7994 | 14        | 0.3  | 811.4072 | 2 | 35.88    | F1:8795  |
| 9  | Elongation factor 1-alpha ( <i>Multisepecies identification</i> )                   | #9  | VVTFGPTGLTTEVK    | 67.89             | 1447.7922 | 14        | -0.3 | 724.9032 | 2 | 33.09    | F2:9535  |
| 10 |                                                                                     | #10 | IERSTNLDWYKGPLL   | 56.9              | 1904.9995 | 16        | -0.3 | 636.0069 | 3 | 35.05    | F2:10458 |
| 11 | Superoxide dismutase [Cu-Zn] 2 ( <i>Multisepecies identification</i> )              | #11 | QIPLTGAHSIIGRA    | 54.47             | 1432.8151 | 14        | 1    | 478.6128 | 3 | 28.96    | F2:7531  |
| 12 | Superoxide dismutase [Cu-Zn], chloroplastic ( <i>Multisepecies identification</i> ) | #12 | IPLSGPNAVIGRA     | 57.98             | 1263.7299 | 13        | -0.4 | 632.8719 | 2 | 30.69    | F1:6408  |
| 13 | Allene oxide synthase 4 ( <i>Multisepecies identification</i> )                     | #13 | LHTRFRLPPFL       | 37.94             | 1239.7128 | 10        | 0    | 620.8636 | 2 | 36.34    | F2:11040 |
| 14 |                                                                                     | #14 | LEELLHT           | 41.29             | 966.5386  | 8         | -0.3 | 484.2764 | 2 | 33.41    | F1:7684  |
| 15 | RTM3-like protein ( <i>Multisepecies identification</i> )                           | #15 | LSRSMKEAGFKLDW    | 42.22             | 1666.8501 | 14        | -3.8 | 834.4291 | 2 | 32.22    | F1:7130  |
| 16 | Photosystem P700 chlorophyll ( <i>Multisepecies identification</i> )                | #16 | VSLPINELLD        | 41.81             | 1111.6124 | 10        | 0.1  | 556.8135 | 2 | 36.15    | F1:8917  |
| 17 | Unknown (De novo sequence)                                                          | #17 | FVCPLNLLAE        | 92% <sup>a)</sup> | 1117.5842 | 10        | -3.4 | 559.7975 | 2 | 36.09    | F2:8889  |

a) Amino acid sequence, derived by de novo analysis, that cannot be directly traced back to known proteins of the investigated database. The score Reported refers to the Average Local Confidence (ALC %). PEAKS assigns a local confidence score for each amino acid in a de novo sequence. The local confidence score ranges from 0% to 99%, indicating how confident the algorithm considers a particular amino acid as the correct assignment. So that, ALC is the average of the local confidence score of all the amino acids in the sequence.

Ribosome-inactivating protein charybdin (*P84786*; *C.pancration*)

#1 ILDISYNKNALQD

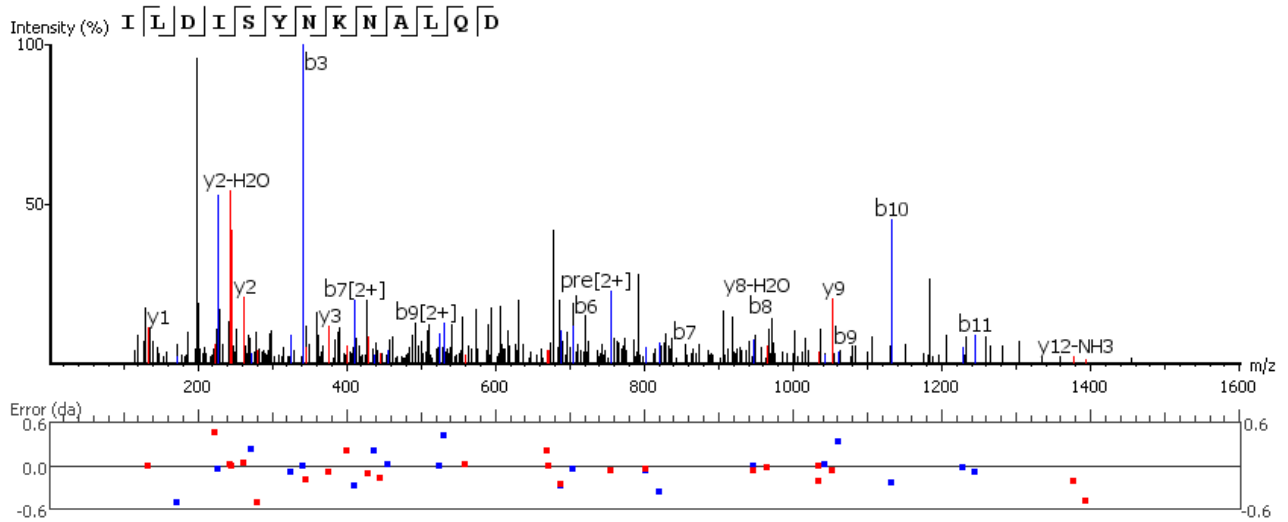

| #  | b       | b-H2O   | b-NH3   | b (2+) | Seq | y       | y-H2O   | y-NH3   | y (2+) | #  |
|----|---------|---------|---------|--------|-----|---------|---------|---------|--------|----|
| 1  | 114.09  | 96.08   | 97.06   | 57.55  | I   |         |         |         |        | 13 |
| 2  | 227.22  | 209.17  | 210.15  | 114.09 | L   | 1394.18 | 1375.69 | 1376.88 | 697.35 | 12 |
| 3  | 342.21  | 324.29  | 325.18  | 172.13 | D   | 1280.61 | 1262.60 | 1263.58 | 640.81 | 11 |
| 4  | 455.26  | 437.28  | 438.04  | 228.14 | I   | 1165.58 | 1147.57 | 1148.56 | 583.29 | 10 |
| 5  | 542.32  | 524.30  | 525.29  | 271.42 | S   | 1052.57 | 1034.70 | 1035.45 | 526.75 | 9  |
| 6  | 705.45  | 687.37  | 688.63  | 353.19 | Y   | 965.50  | 947.53  | 948.44  | 483.23 | 8  |
| 7  | 819.79  | 801.41  | 802.47  | 410.49 | N   | 802.47  | 784.39  | 785.38  | 401.48 | 7  |
| 8  | 947.53  | 929.51  | 930.49  | 474.26 | K   | 688.63  | 670.14  | 671.33  | 344.88 | 6  |
| 9  | 1061.22 | 1043.53 | 1044.54 | 530.84 | N   | 560.23  | 542.26  | 543.24  | 281.14 | 5  |
| 10 | 1132.84 | 1114.59 | 1115.57 | 566.80 | A   | 446.41  | 428.21  | 429.32  | 223.14 | 4  |
| 11 | 1245.79 | 1227.67 | 1228.70 | 623.34 | L   | 375.28  | 357.18  | 358.16  | 188.09 | 3  |
| 12 | 1373.74 | 1355.73 | 1356.72 | 687.37 | Q   | 262.04  | 244.06  | 245.06  | 131.55 | 2  |
| 13 |         |         |         |        | D   | 134.06  | 116.03  | 117.02  | 67.52  | 1  |

Ribosome-inactivating protein charybdin (*P84786; C.pancration*)

#2 SEPVKLPQWMQN D

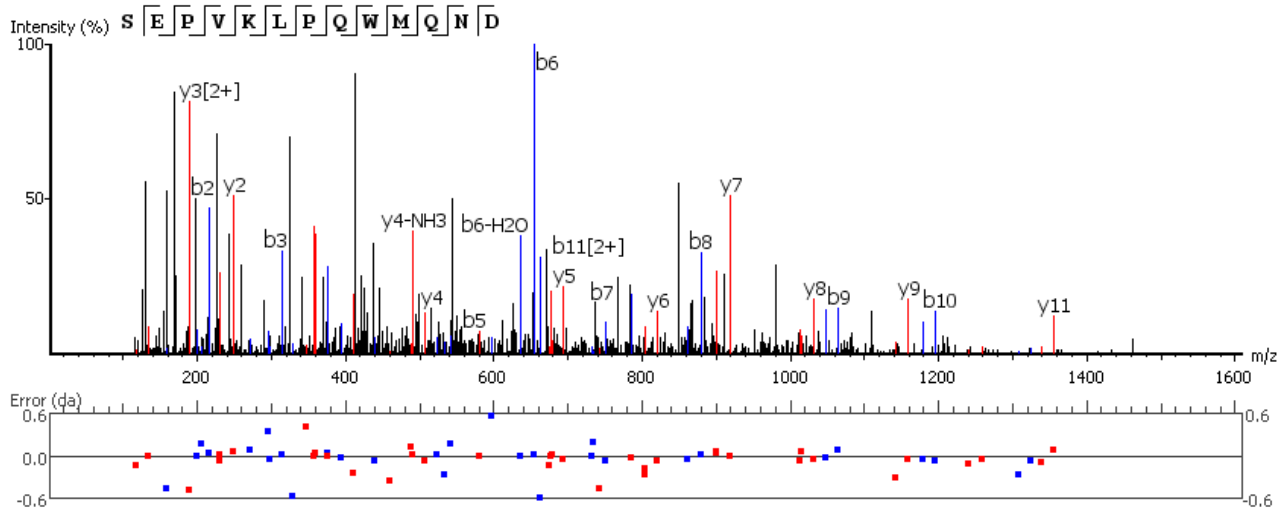

| #  | b       | b-H2O   | b-NH3   | b (2+) | Seq | y       | y-H2O   | y-NH3   | y (2+) | #  |
|----|---------|---------|---------|--------|-----|---------|---------|---------|--------|----|
| 1  | 88.04   | 70.03   | 71.01   | 44.52  | S   |         |         |         |        | 13 |
| 2  | 217.02  | 199.05  | 200.06  | 109.04 | E   | 1484.72 | 1466.71 | 1467.69 | 743.32 | 12 |
| 3  | 314.11  | 295.77  | 297.16  | 158.03 | P   | 1355.59 | 1337.67 | 1338.74 | 678.32 | 11 |
| 4  | 413.20  | 395.22  | 396.18  | 206.93 | V   | 1258.68 | 1240.72 | 1241.60 | 629.81 | 10 |
| 5  | 541.12  | 523.26  | 524.27  | 271.06 | K   | 1159.61 | 1141.85 | 1142.84 | 580.29 | 9  |
| 6  | 654.35  | 636.36  | 637.36  | 328.28 | L   | 1031.51 | 1013.53 | 1014.36 | 516.23 | 8  |
| 7  | 751.50  | 733.42  | 734.21  | 376.17 | P   | 918.38  | 900.31  | 901.28  | 460.04 | 7  |
| 8  | 879.46  | 861.54  | 862.47  | 440.33 | Q   | 821.41  | 803.58  | 804.48  | 411.42 | 6  |
| 9  | 1065.48 | 1047.60 | 1048.55 | 533.55 | W   | 693.32  | 675.39  | 676.24  | 346.72 | 5  |
| 10 | 1196.69 | 1178.66 | 1179.59 | 598.23 | M   | 507.27  | 489.04  | 490.12  | 254.09 | 4  |
| 11 | 1324.76 | 1306.66 | 1307.91 | 663.43 | Q   | 376.17  | 358.14  | 359.06  | 189.06 | 3  |
| 12 | 1438.72 | 1420.70 | 1421.69 | 719.86 | N   | 248.01  | 230.16  | 231.02  | 124.54 | 2  |
| 13 |         |         |         |        | D   | 134.07  | 116.03  | 117.16  | 67.52  | 1  |

Ribosome-inactivating protein charybdin (P84786; *C.pancration*)

#3 VDIANHFAN

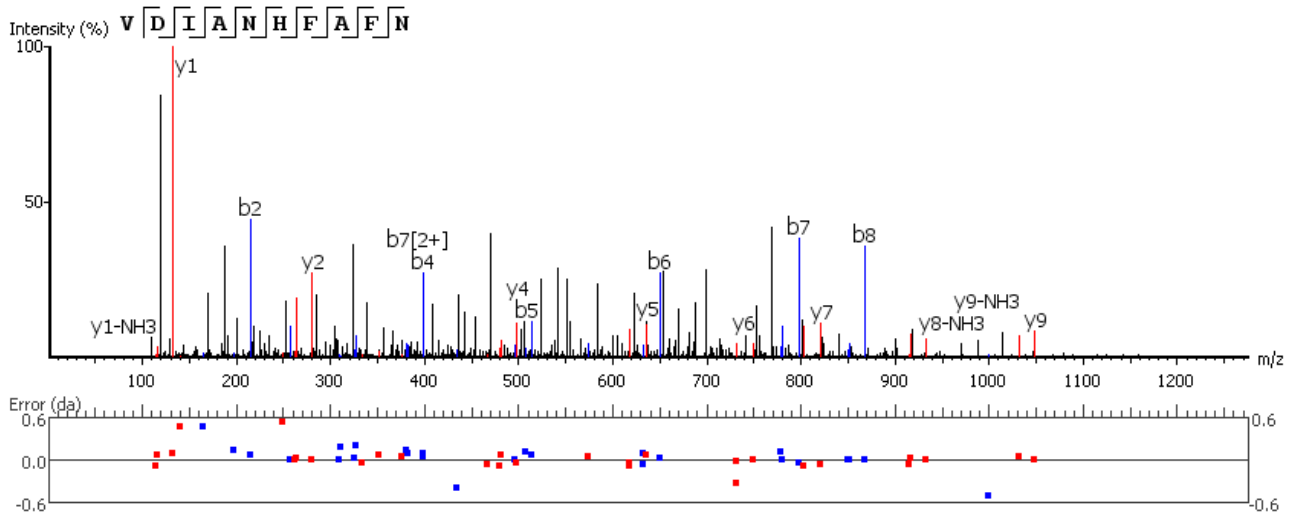

| #  | b       | b-H2O  | b-NH3  | b (2+) | Seq | y       | y-H2O   | y-NH3   | y (2+) | #  |
|----|---------|--------|--------|--------|-----|---------|---------|---------|--------|----|
| 1  | 100.08  | 82.07  | 83.05  | 50.54  | V   |         |         |         |        | 10 |
| 2  | 215.03  | 196.95 | 198.08 | 108.05 | D   | 1048.49 | 1030.47 | 1031.41 | 524.74 | 9  |
| 3  | 327.98  | 310.16 | 310.98 | 164.12 | I   | 933.47  | 915.52  | 916.40  | 467.30 | 8  |
| 4  | 399.13  | 381.07 | 382.10 | 200.11 | A   | 820.45  | 802.36  | 803.45  | 410.69 | 7  |
| 5  | 513.19  | 495.26 | 496.25 | 257.13 | N   | 749.35  | 731.67  | 732.35  | 375.12 | 6  |
| 6  | 650.28  | 632.40 | 633.19 | 325.64 | H   | 635.21  | 617.35  | 618.37  | 318.15 | 5  |
| 7  | 797.46  | 779.27 | 780.38 | 399.13 | F   | 498.29  | 480.33  | 481.12  | 249.07 | 4  |
| 8  | 868.42  | 850.41 | 851.40 | 435.13 | A   | 351.09  | 333.16  | 334.19  | 176.08 | 3  |
| 9  | 1015.50 | 997.49 | 999.01 | 508.13 | F   | 280.14  | 262.13  | 263.07  | 140.09 | 2  |
| 10 |         |        |        |        | N   | 132.97  | 115.15  | 115.97  | 67.03  | 1  |

Ribosome-inactivating protein charybdin (*P84786*; *C.pancration*)

#4 ILDISYNKNALQDAVSK

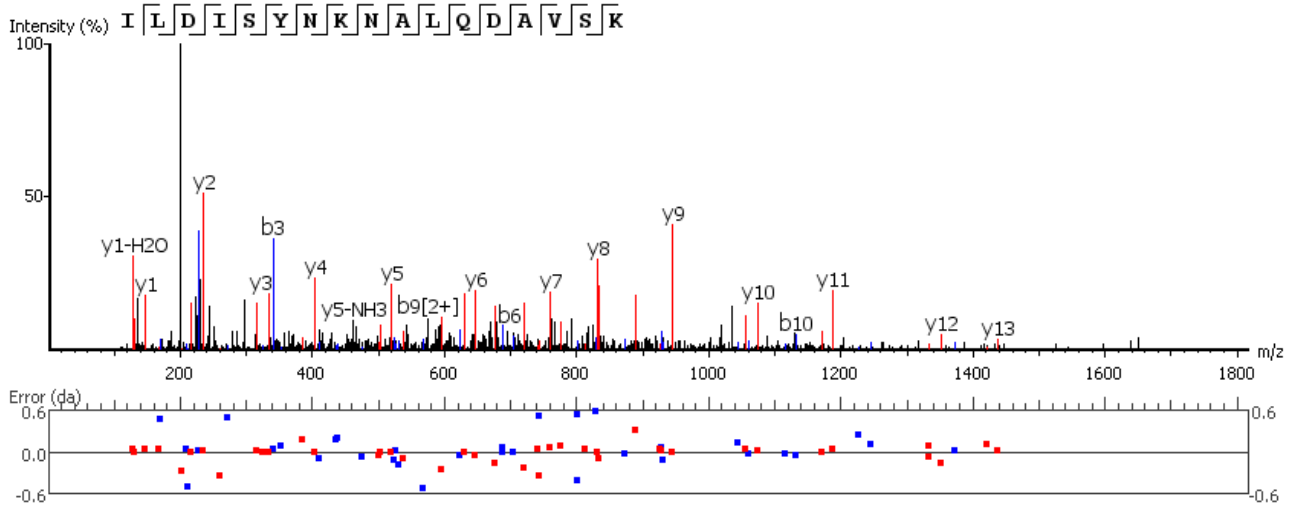

| #  | b       | b-H2O   | b-NH3   | b (2+) | Seq | y       | y-H2O   | y-NH3   | y (2+) | #  |
|----|---------|---------|---------|--------|-----|---------|---------|---------|--------|----|
| 1  | 114.09  | 96.08   | 97.06   | 57.55  | I   |         |         |         |        | 17 |
| 2  | 227.14  | 209.10  | 210.67  | 114.09 | L   | 1778.93 | 1760.92 | 1761.90 | 889.63 | 16 |
| 3  | 342.15  | 324.18  | 325.18  | 171.12 | D   | 1665.84 | 1647.83 | 1648.82 | 833.53 | 15 |
| 4  | 455.29  | 437.09  | 438.04  | 228.14 | I   | 1550.82 | 1532.81 | 1533.79 | 775.80 | 14 |
| 5  | 542.32  | 524.42  | 525.25  | 271.15 | S   | 1437.70 | 1419.72 | 1420.58 | 719.61 | 13 |
| 6  | 705.38  | 687.37  | 688.27  | 353.09 | Y   | 1350.86 | 1332.59 | 1333.76 | 676.03 | 12 |
| 7  | 819.43  | 801.84  | 801.84  | 410.31 | N   | 1187.59 | 1169.63 | 1170.61 | 594.59 | 11 |
| 8  | 947.52  | 929.43  | 930.63  | 474.33 | K   | 1073.57 | 1055.58 | 1056.51 | 537.40 | 10 |
| 9  | 1061.60 | 1043.41 | 1044.54 | 531.47 | N   | 945.49  | 927.43  | 928.45  | 473.25 | 9  |
| 10 | 1132.66 | 1114.59 | 1115.62 | 567.34 | A   | 831.44  | 813.38  | 814.43  | 416.23 | 8  |
| 11 | 1245.56 | 1227.41 | 1228.66 | 623.39 | L   | 760.33  | 742.36  | 743.75  | 380.71 | 7  |
| 12 | 1373.72 | 1355.73 | 1356.72 | 687.37 | Q   | 647.39  | 629.32  | 630.31  | 324.18 | 6  |
| 13 | 1488.77 | 1470.76 | 1471.74 | 744.36 | D   | 519.27  | 501.32  | 502.27  | 260.49 | 5  |
| 14 | 1559.81 | 1541.80 | 1542.78 | 780.40 | A   | 404.25  | 386.06  | 387.22  | 202.90 | 4  |
| 15 | 1658.88 | 1640.86 | 1641.85 | 829.34 | V   | 333.19  | 315.17  | 316.14  | 167.06 | 3  |
| 16 | 1745.91 | 1727.90 | 1728.88 | 873.48 | S   | 234.10  | 216.15  | 217.12  | 117.57 | 2  |
| 17 |         |         |         |        | K   | 147.06  | 129.04  | 130.11  | 74.06  | 1  |

Ribosome-inactivating protein charybdin (*P84786*; *C.pancration*)

#5 LPQWMQNDELK N

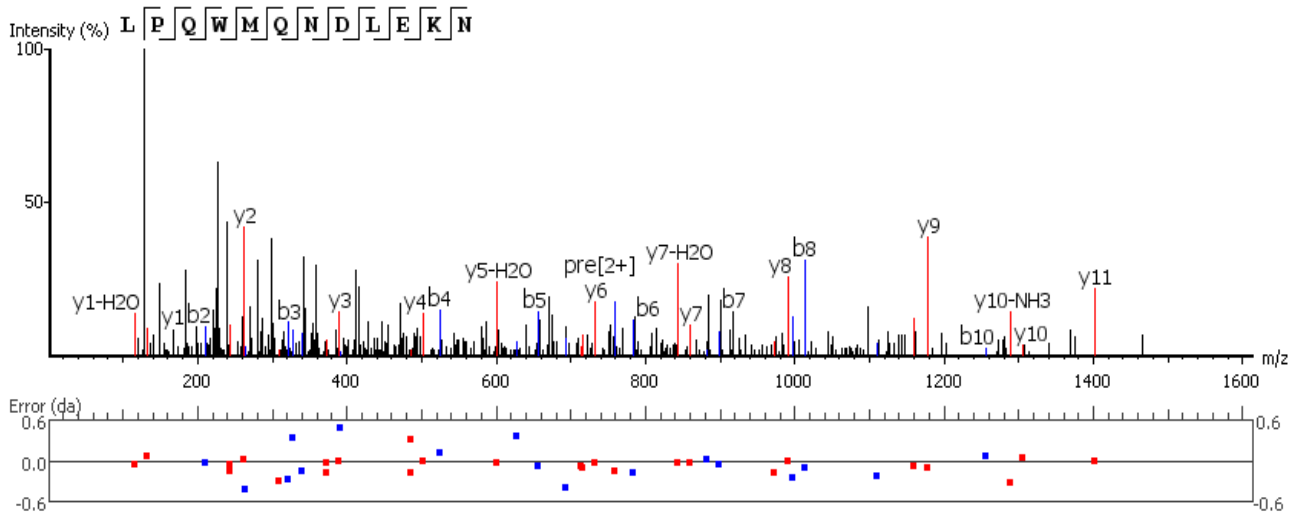

| #  | b       | b-H2O   | b-NH3   | b (2+) | Seq | y       | y-H2O   | y-NH3   | y (2+) | #  |
|----|---------|---------|---------|--------|-----|---------|---------|---------|--------|----|
| 1  | 114.09  | 96.08   | 97.06   | 57.55  | L   |         |         |         |        | 12 |
| 2  | 211.19  | 193.13  | 194.12  | 106.07 | P   | 1402.63 | 1384.63 | 1385.61 | 701.82 | 11 |
| 3  | 339.35  | 321.48  | 322.18  | 170.10 | Q   | 1305.52 | 1287.58 | 1288.90 | 653.29 | 10 |
| 4  | 525.14  | 507.27  | 508.26  | 263.57 | W   | 1177.65 | 1159.62 | 1160.50 | 589.27 | 9  |
| 5  | 656.40  | 638.31  | 639.30  | 328.30 | M   | 991.45  | 973.63  | 974.42  | 496.23 | 8  |
| 6  | 784.56  | 766.37  | 767.35  | 392.20 | Q   | 860.45  | 842.43  | 843.38  | 430.71 | 7  |
| 7  | 898.48  | 880.41  | 881.35  | 449.71 | N   | 732.38  | 714.42  | 715.44  | 366.68 | 6  |
| 8  | 1013.57 | 995.44  | 996.69  | 507.23 | D   | 618.31  | 600.33  | 601.28  | 309.97 | 5  |
| 9  | 1126.54 | 1108.53 | 1109.73 | 563.77 | L   | 503.29  | 484.93  | 486.44  | 252.14 | 4  |
| 10 | 1255.50 | 1237.57 | 1238.55 | 627.91 | E   | 390.17  | 372.38  | 373.21  | 195.60 | 3  |
| 11 | 1383.67 | 1365.66 | 1366.65 | 692.74 | K   | 261.11  | 243.21  | 244.29  | 131.08 | 2  |
| 12 |         |         |         |        | N   | 132.99  | 115.11  | 116.03  | 67.03  | 1  |

Ribosome-inactivating protein charybdin (*P84786*; *C.pancration*)

#6 LEKNWVRF<sup>+</sup>S<sup>+</sup>F

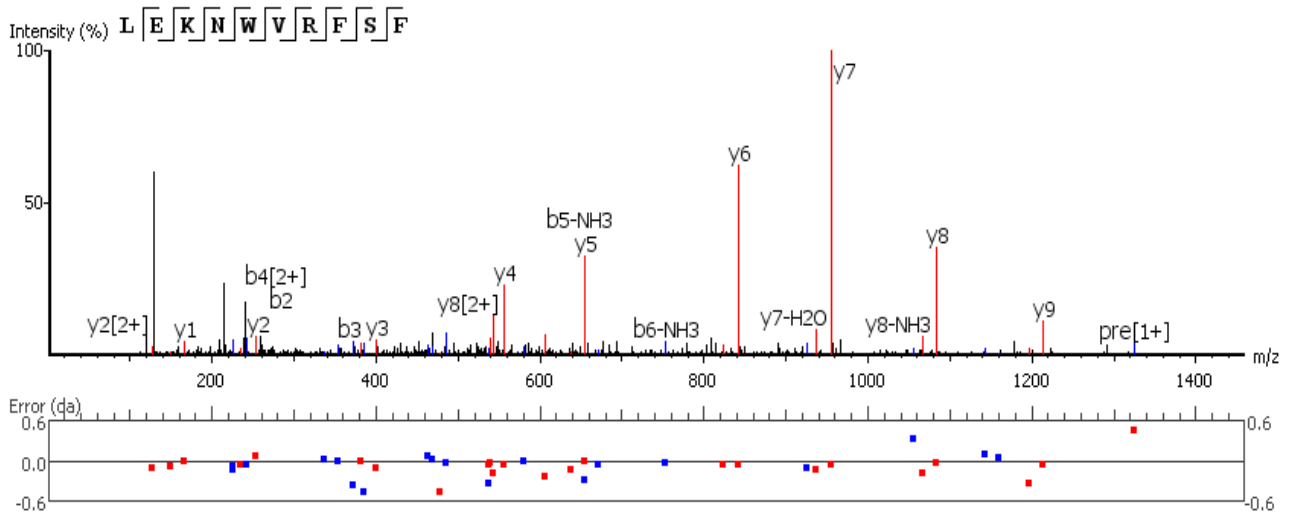

| #  | b       | b-H2O   | b-NH3   | b (2+) | Seq | y       | y-H2O   | y-NH3   | y (2+) | #  |
|----|---------|---------|---------|--------|-----|---------|---------|---------|--------|----|
| 1  | 114.09  | 96.08   | 97.06   | 57.55  | L   |         |         |         |        | 10 |
| 2  | 243.20  | 225.21  | 226.25  | 122.07 | E   | 1212.68 | 1194.61 | 1195.93 | 607.06 | 9  |
| 3  | 371.60  | 353.23  | 354.20  | 186.11 | K   | 1083.62 | 1065.56 | 1066.75 | 542.48 | 8  |
| 4  | 485.30  | 467.26  | 468.22  | 243.20 | N   | 955.53  | 937.61  | 938.45  | 478.70 | 7  |
| 5  | 671.41  | 653.34  | 654.61  | 336.14 | W   | 841.49  | 823.42  | 824.46  | 421.22 | 6  |
| 6  | 770.42  | 752.41  | 753.44  | 386.17 | V   | 655.36  | 637.35  | 638.47  | 328.18 | 5  |
| 7  | 926.63  | 908.51  | 909.49  | 463.66 | R   | 556.34  | 538.34  | 539.29  | 278.64 | 4  |
| 8  | 1073.59 | 1055.58 | 1056.23 | 537.63 | F   | 400.30  | 382.19  | 383.16  | 200.59 | 3  |
| 9  | 1160.55 | 1142.50 | 1143.59 | 580.79 | S   | 253.04  | 235.18  | 236.09  | 127.18 | 2  |
| 10 |         |         |         |        | F   | 166.11  | 148.08  | 149.14  | 83.54  | 1  |

Ribosome-inactivating protein charybdin (P84786; *C.pancration*)

#7 VDIANHFAFNLE

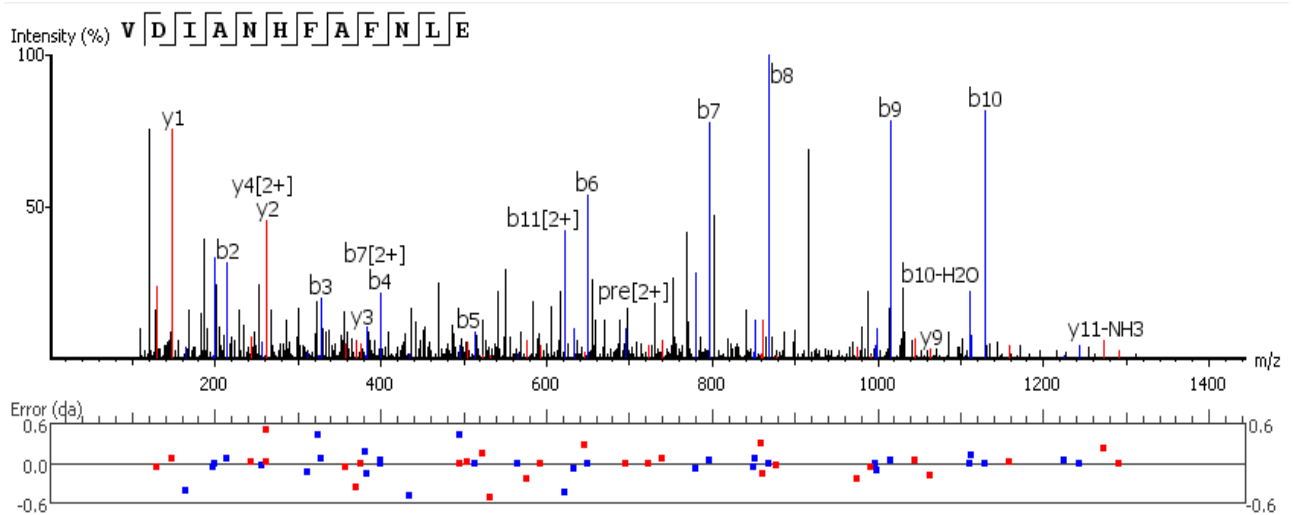

| #  | b       | b-H2O   | b-NH3   | b (2+) | Seq | y       | y-H2O   | y-NH3   | y (2+) | #  |
|----|---------|---------|---------|--------|-----|---------|---------|---------|--------|----|
| 1  | 100.08  | 82.07   | 83.05   | 50.54  | V   |         |         |         |        | 12 |
| 2  | 215.03  | 197.16  | 198.08  | 108.05 | D   | 1290.62 | 1272.60 | 1273.35 | 645.51 | 11 |
| 3  | 328.10  | 310.18  | 311.31  | 165.01 | I   | 1175.58 | 1157.57 | 1158.53 | 588.29 | 10 |
| 4  | 399.17  | 381.03  | 382.35  | 200.13 | A   | 1062.69 | 1044.49 | 1045.41 | 532.27 | 9  |
| 5  | 513.26  | 494.80  | 496.23  | 257.16 | N   | 991.52  | 973.45  | 974.69  | 496.23 | 8  |
| 6  | 650.35  | 632.41  | 633.30  | 325.21 | H   | 877.45  | 859.10  | 860.56  | 439.21 | 7  |
| 7  | 797.32  | 779.46  | 780.37  | 399.17 | F   | 740.27  | 722.35  | 723.34  | 371.05 | 6  |
| 8  | 868.41  | 850.49  | 851.31  | 435.21 | A   | 593.32  | 575.28  | 576.51  | 297.15 | 5  |
| 9  | 1015.44 | 997.47  | 998.59  | 508.25 | F   | 522.08  | 504.25  | 505.20  | 261.12 | 4  |
| 10 | 1129.56 | 1111.54 | 1112.38 | 565.25 | N   | 375.21  | 357.18  | 358.24  | 188.09 | 3  |
| 11 | 1242.64 | 1224.62 | 1225.54 | 622.25 | L   | 261.12  | 243.10  | 244.12  | 131.07 | 2  |
| 12 |         |         |         |        | E   | 147.96  | 130.11  | 131.03  | 74.53  | 1  |



Ribosome-inactivating protein charybdin (*P84786; C.pancration*)

#8 DILDISYNKNALQD

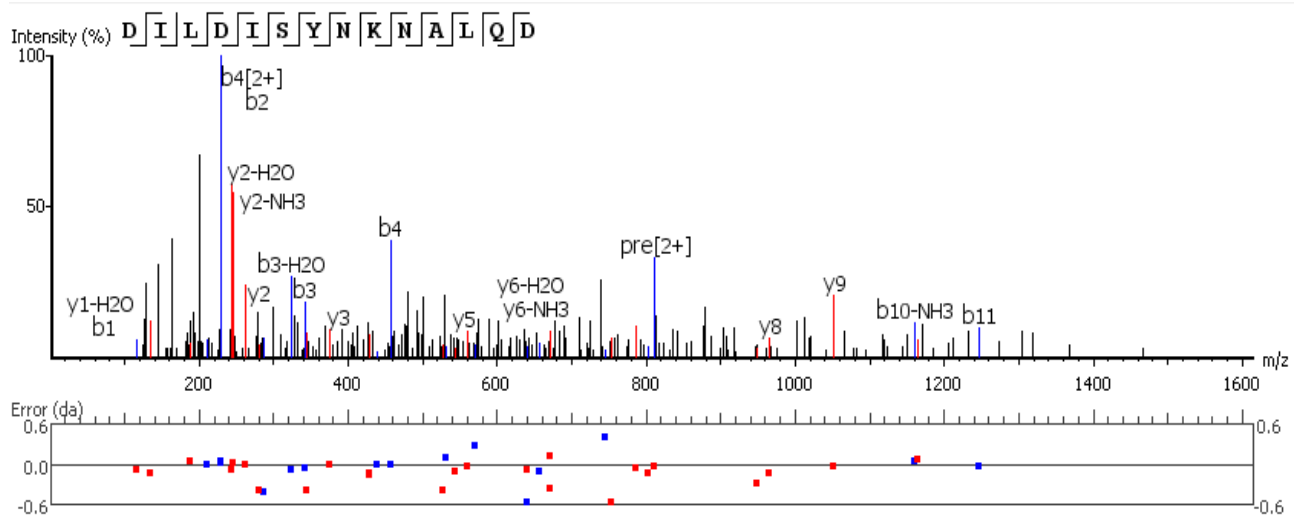

| #  | b       | b-H2O   | b-NH3   | b (2+) | Seq | y       | y-H2O   | y-NH3   | y (2+) | #  |
|----|---------|---------|---------|--------|-----|---------|---------|---------|--------|----|
| 1  | 116.12  | 98.02   | 99.01   | 58.52  | D   |         |         |         |        | 14 |
| 2  | 229.07  | 211.12  | 212.09  | 115.06 | I   | 1506.78 | 1488.77 | 1489.75 | 754.46 | 13 |
| 3  | 342.27  | 324.28  | 325.18  | 171.60 | L   | 1393.70 | 1375.69 | 1376.67 | 697.35 | 12 |
| 4  | 457.21  | 439.21  | 440.20  | 229.07 | D   | 1280.61 | 1262.60 | 1263.58 | 640.91 | 11 |
| 5  | 570.02  | 552.30  | 553.29  | 286.08 | I   | 1165.50 | 1147.57 | 1148.56 | 583.29 | 10 |
| 6  | 657.46  | 639.34  | 640.91  | 329.17 | S   | 1052.55 | 1034.49 | 1035.47 | 527.14 | 9  |
| 7  | 820.41  | 802.53  | 803.38  | 410.70 | Y   | 965.62  | 947.46  | 948.73  | 483.23 | 8  |
| 8  | 934.45  | 916.44  | 917.43  | 467.73 | N   | 802.53  | 784.39  | 785.44  | 401.70 | 7  |
| 9  | 1062.55 | 1044.54 | 1045.52 | 531.67 | K   | 688.36  | 670.20  | 671.69  | 345.09 | 6  |
| 10 | 1176.59 | 1158.58 | 1159.51 | 588.80 | N   | 560.31  | 542.26  | 543.35  | 281.02 | 5  |
| 11 | 1247.68 | 1229.62 | 1230.60 | 624.31 | A   | 446.22  | 428.36  | 429.36  | 223.61 | 4  |
| 12 | 1360.71 | 1342.70 | 1343.68 | 680.86 | L   | 375.17  | 357.18  | 358.16  | 188.04 | 3  |
| 13 | 1488.77 | 1470.76 | 1471.74 | 744.45 | Q   | 262.08  | 244.18  | 245.05  | 131.55 | 2  |
| 14 |         |         |         |        | D   | 134.18  | 116.12  | 117.02  | 67.52  | 1  |

Elongation factor 1-alpha (*multispecies identification*)

#9 VVTFGPTGLTTEVK

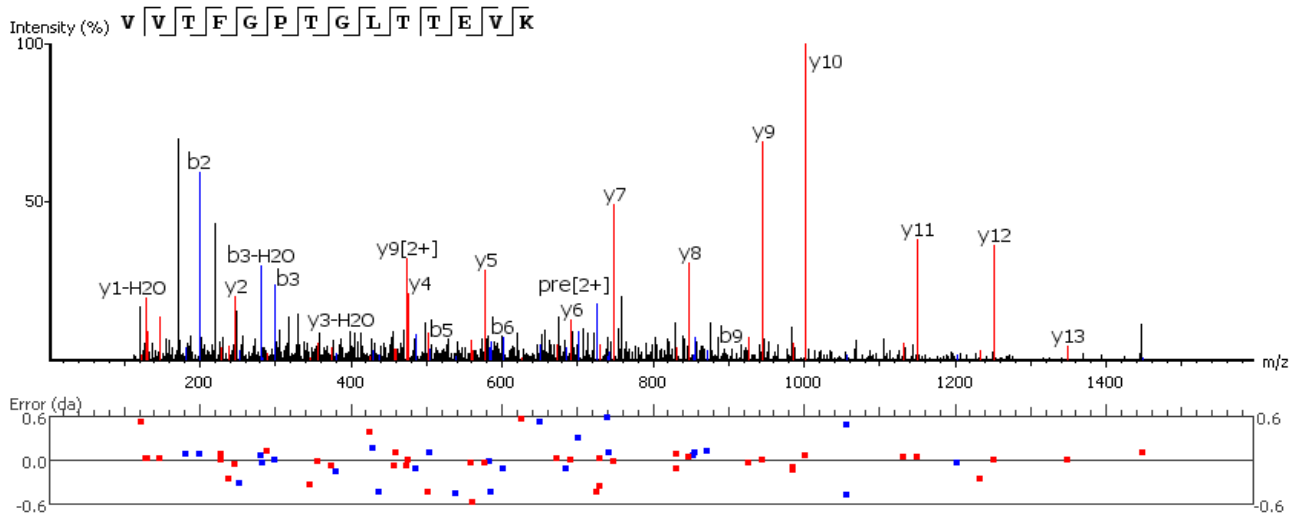

| #  | b       | b-H2O   | b-NH3   | b (2+) | Seq | y       | y-H2O   | y-NH3   | y (2+) | #  |
|----|---------|---------|---------|--------|-----|---------|---------|---------|--------|----|
| 1  | 100.08  | 82.07   | 83.05   | 50.54  | V   |         |         |         |        | 14 |
| 2  | 199.06  | 181.04  | 182.12  | 100.07 | V   | 1349.74 | 1331.72 | 1332.70 | 675.37 | 13 |
| 3  | 300.20  | 282.11  | 283.22  | 150.60 | T   | 1250.68 | 1232.92 | 1233.64 | 625.26 | 12 |
| 4  | 447.26  | 429.09  | 430.23  | 224.13 | F   | 1149.57 | 1131.55 | 1132.59 | 575.31 | 11 |
| 5  | 504.17  | 486.39  | 487.26  | 252.97 | G   | 1002.48 | 984.68  | 985.63  | 502.23 | 10 |
| 6  | 601.46  | 583.36  | 584.76  | 301.17 | P   | 945.51  | 927.57  | 928.50  | 473.35 | 9  |
| 7  | 702.07  | 684.49  | 685.36  | 351.69 | T   | 848.42  | 830.37  | 831.57  | 424.35 | 8  |
| 8  | 759.40  | 740.80  | 742.28  | 380.38 | G   | 747.45  | 729.39  | 730.77  | 374.30 | 7  |
| 9  | 872.36  | 854.41  | 855.36  | 437.19 | L   | 690.42  | 672.37  | 673.38  | 346.05 | 6  |
| 10 | 973.54  | 955.53  | 956.51  | 487.27 | T   | 577.38  | 559.36  | 560.88  | 289.04 | 5  |
| 11 | 1074.58 | 1057.06 | 1057.06 | 538.26 | T   | 476.29  | 458.35  | 459.14  | 238.90 | 4  |
| 12 | 1203.68 | 1185.62 | 1186.60 | 602.31 | E   | 375.22  | 357.24  | 358.20  | 188.11 | 3  |
| 13 | 1302.69 | 1284.68 | 1285.67 | 651.32 | V   | 246.24  | 228.18  | 229.07  | 123.05 | 2  |
| 14 |         |         |         |        | K   | 147.09  | 129.07  | 130.06  | 74.06  | 1  |

Elongation factor 1-alpha (*multispecies identification*)

#10 IERSTNLDWYKGP T L L

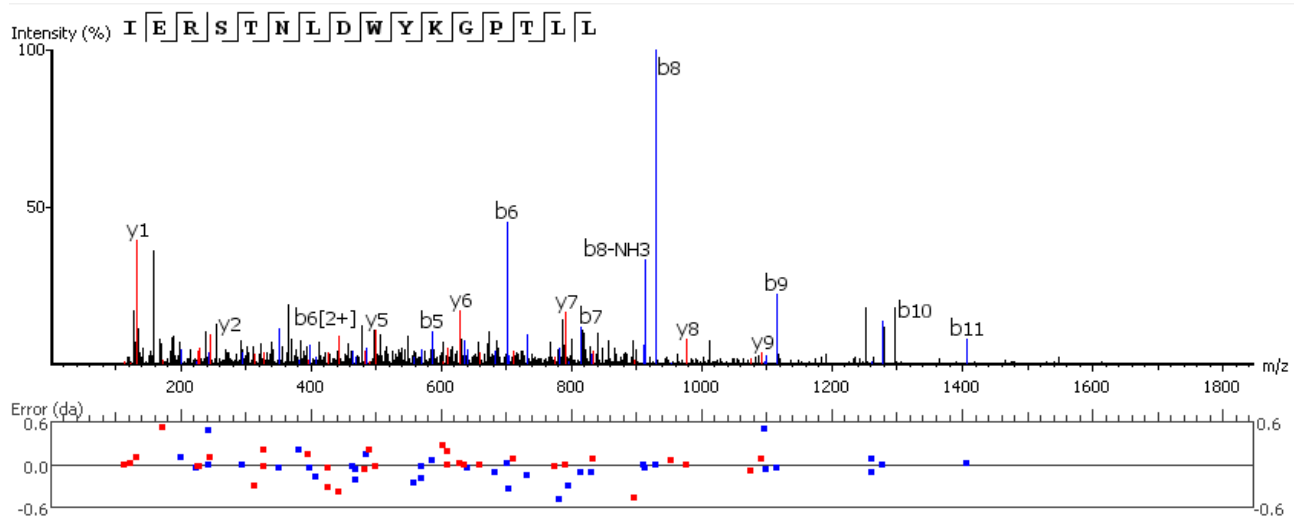

| #  | b       | b-H2O   | b-NH3   | b (2+) | Seq | y       | y-H2O   | y-NH3   | y (2+) | #  |
|----|---------|---------|---------|--------|-----|---------|---------|---------|--------|----|
| 1  | 114.09  | 96.08   | 97.06   | 57.55  | I   |         |         |         |        | 16 |
| 2  | 243.13  | 225.17  | 226.11  | 122.07 | E   | 1792.92 | 1774.91 | 1775.90 | 897.43 | 15 |
| 3  | 399.29  | 381.01  | 382.21  | 200.01 | R   | 1663.88 | 1645.87 | 1646.85 | 832.34 | 14 |
| 4  | 486.11  | 468.48  | 469.32  | 243.13 | S   | 1507.78 | 1489.77 | 1490.75 | 754.39 | 13 |
| 5  | 587.25  | 569.50  | 570.33  | 294.18 | T   | 1420.75 | 1402.74 | 1403.72 | 710.78 | 12 |
| 6  | 701.33  | 683.46  | 684.33  | 351.24 | N   | 1319.70 | 1301.69 | 1302.67 | 660.34 | 11 |
| 7  | 814.55  | 796.75  | 797.42  | 407.89 | L   | 1205.66 | 1187.65 | 1188.63 | 603.04 | 10 |
| 8  | 929.46  | 911.48  | 912.51  | 465.26 | D   | 1092.48 | 1074.67 | 1075.55 | 546.79 | 9  |
| 9  | 1115.60 | 1097.01 | 1098.60 | 558.53 | W   | 977.56  | 959.53  | 960.52  | 489.06 | 8  |
| 10 | 1278.61 | 1260.72 | 1261.48 | 639.86 | Y   | 791.48  | 773.49  | 774.44  | 396.08 | 7  |
| 11 | 1406.68 | 1388.70 | 1389.68 | 704.20 | K   | 628.38  | 610.39  | 611.17  | 315.01 | 6  |
| 12 | 1463.73 | 1445.72 | 1446.70 | 732.52 | G   | 500.35  | 482.37  | 483.28  | 250.65 | 5  |
| 13 | 1560.78 | 1542.77 | 1543.75 | 781.39 | P   | 443.67  | 425.60  | 426.31  | 222.14 | 4  |
| 14 | 1661.83 | 1643.82 | 1644.80 | 831.52 | T   | 346.23  | 328.26  | 329.00  | 173.09 | 3  |
| 15 | 1774.91 | 1756.90 | 1757.89 | 887.96 | L   | 245.08  | 227.22  | 228.20  | 123.06 | 2  |
| 16 |         |         |         |        | L   | 131.99  | 114.09  | 115.08  | 66.55  | 1  |

Superoxide dismutase [Cu-Zn] (*multispecies identification*)

#11 QIPLTGAHSIIIGRA

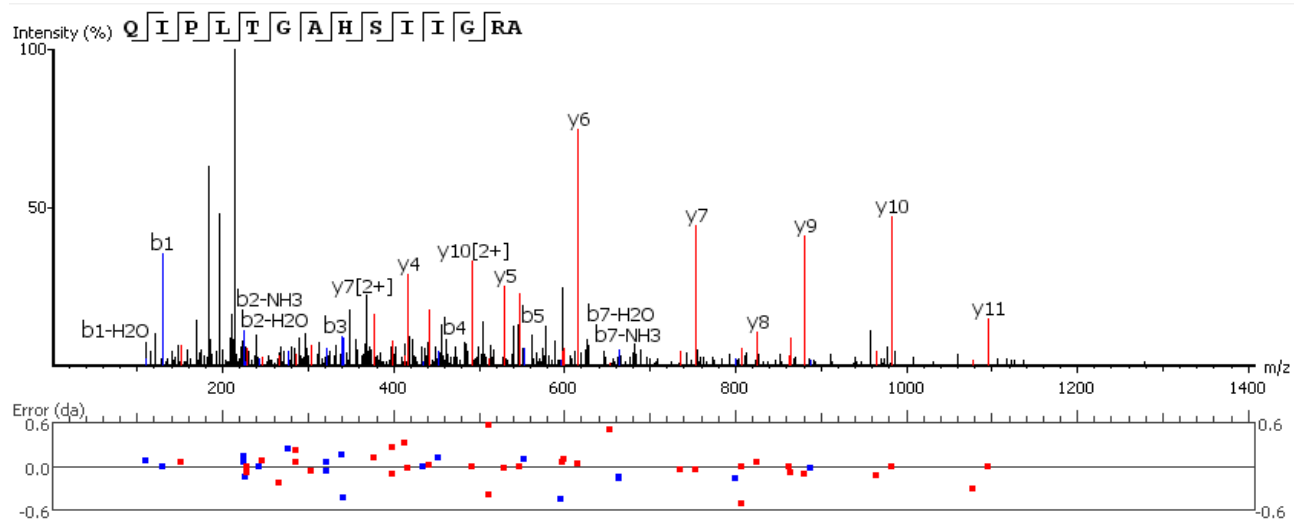

| #  | b       | b-H2O   | b-NH3   | b (2+) | Seq | y       | y-H2O   | y-NH3   | y (2+) | #  |
|----|---------|---------|---------|--------|-----|---------|---------|---------|--------|----|
| 1  | 129.07  | 110.96  | 112.04  | 65.03  | Q   |         |         |         |        | 14 |
| 2  | 242.13  | 224.06  | 224.98  | 121.58 | I   | 1305.76 | 1287.75 | 1288.74 | 652.87 | 13 |
| 3  | 339.04  | 321.12  | 322.24  | 170.10 | P   | 1192.68 | 1174.67 | 1175.65 | 596.77 | 12 |
| 4  | 452.16  | 434.28  | 435.24  | 226.79 | L   | 1095.65 | 1077.94 | 1078.60 | 548.31 | 11 |
| 5  | 553.22  | 535.32  | 536.31  | 276.92 | T   | 982.54  | 964.66  | 965.52  | 491.77 | 10 |
| 6  | 610.36  | 592.35  | 593.33  | 305.68 | G   | 881.61  | 863.48  | 864.56  | 441.22 | 9  |
| 7  | 681.39  | 663.53  | 664.54  | 341.63 | A   | 824.41  | 806.46  | 807.97  | 412.41 | 8  |
| 8  | 818.45  | 800.61  | 801.43  | 409.73 | H   | 753.48  | 735.43  | 736.46  | 377.09 | 7  |
| 9  | 905.48  | 887.47  | 888.49  | 453.24 | S   | 616.33  | 598.37  | 599.25  | 308.69 | 6  |
| 10 | 1018.57 | 1000.56 | 1001.54 | 509.78 | I   | 529.37  | 511.73  | 511.73  | 265.41 | 5  |
| 11 | 1131.65 | 1113.64 | 1114.63 | 566.33 | I   | 416.30  | 397.99  | 399.35  | 208.63 | 4  |
| 12 | 1188.67 | 1170.66 | 1171.65 | 595.30 | G   | 303.26  | 285.09  | 285.91  | 152.02 | 3  |
| 13 | 1344.78 | 1326.76 | 1327.75 | 672.89 | R   | 246.06  | 228.15  | 229.23  | 123.58 | 2  |
| 14 |         |         |         |        | A   | 90.05   | 72.04   | 73.03   | 45.53  | 1  |

Superoxide dismutase [Cu-Zn], chloroplastic (*multispecies identification*)

#12 IPLSGPNAVIGRA

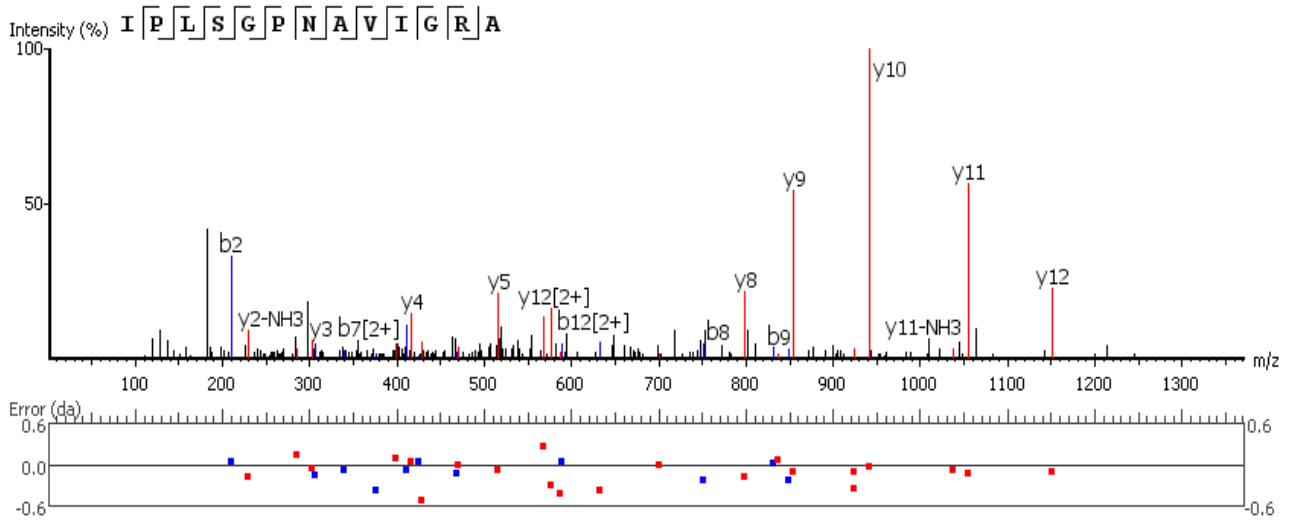

| #  | b       | b-H2O   | b-NH3   | b (2+) | Seq | y       | y-H2O   | y-NH3   | y (2+) | #  |
|----|---------|---------|---------|--------|-----|---------|---------|---------|--------|----|
| 1  | 114.09  | 96.08   | 97.06   | 57.55  | I   |         |         |         |        | 13 |
| 2  | 211.09  | 193.13  | 194.12  | 106.07 | P   | 1151.77 | 1133.64 | 1134.63 | 576.63 | 12 |
| 3  | 324.23  | 306.38  | 307.20  | 162.61 | L   | 1054.73 | 1036.59 | 1037.67 | 527.80 | 11 |
| 4  | 411.35  | 393.25  | 394.23  | 206.13 | S   | 941.55  | 923.85  | 924.61  | 471.24 | 10 |
| 5  | 468.41  | 450.27  | 451.26  | 234.64 | G   | 854.59  | 836.47  | 837.37  | 428.27 | 9  |
| 6  | 565.33  | 547.32  | 548.31  | 283.17 | P   | 797.65  | 779.45  | 780.44  | 399.13 | 8  |
| 7  | 679.38  | 661.37  | 662.35  | 340.28 | N   | 700.42  | 682.40  | 683.38  | 350.71 | 7  |
| 8  | 750.64  | 732.40  | 733.39  | 376.09 | A   | 586.79  | 568.07  | 569.34  | 293.68 | 6  |
| 9  | 849.73  | 831.45  | 832.46  | 425.18 | V   | 515.42  | 497.32  | 498.30  | 258.16 | 5  |
| 10 | 962.57  | 944.56  | 945.54  | 481.78 | I   | 416.20  | 398.25  | 399.13  | 208.63 | 4  |
| 11 | 1019.59 | 1001.58 | 1002.56 | 510.29 | G   | 303.23  | 285.17  | 285.99  | 152.09 | 3  |
| 12 | 1175.69 | 1157.68 | 1158.66 | 588.28 | R   | 246.16  | 228.15  | 229.31  | 123.58 | 2  |
| 13 |         |         |         |        | A   | 90.05   | 72.04   | 73.03   | 45.53  | 1  |

Allene oxide synthase (*multispecies identification*)

#13 LHTFRLPPFL

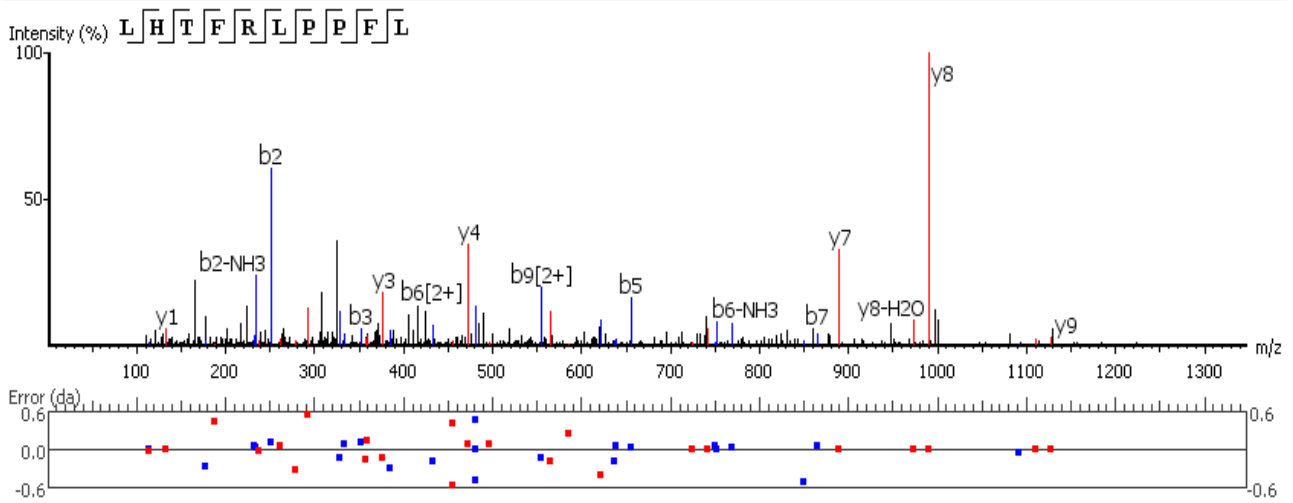

| #  | b       | b-H2O   | b-NH3   | b (2+) | Seq | y       | y-H2O   | y-NH3   | y (2+) | #  |
|----|---------|---------|---------|--------|-----|---------|---------|---------|--------|----|
| 1  | 114.12  | 96.08   | 97.06   | 57.55  | L   |         |         |         |        | 10 |
| 2  | 251.02  | 233.08  | 234.08  | 126.08 | H   | 1127.61 | 1109.63 | 1110.60 | 564.52 | 9  |
| 3  | 352.08  | 334.10  | 335.17  | 176.89 | T   | 990.56  | 972.59  | 973.55  | 495.70 | 8  |
| 4  | 499.27  | 481.77  | 481.77  | 250.13 | F   | 889.54  | 871.52  | 872.50  | 445.26 | 7  |
| 5  | 655.34  | 637.56  | 638.28  | 328.35 | R   | 742.47  | 724.43  | 725.43  | 371.73 | 6  |
| 6  | 768.41  | 750.37  | 751.43  | 385.03 | L   | 586.11  | 568.35  | 569.33  | 293.12 | 5  |
| 7  | 865.44  | 847.49  | 849.01  | 433.44 | P   | 473.19  | 455.84  | 455.84  | 237.17 | 4  |
| 8  | 962.56  | 944.55  | 945.53  | 481.77 | P   | 376.37  | 358.38  | 359.06  | 188.15 | 3  |
| 9  | 1109.63 | 1091.68 | 1092.60 | 555.47 | F   | 279.51  | 261.10  | 262.14  | 140.09 | 2  |
| 10 |         |         |         |        | L   | 132.08  | 114.12  | 115.07  | 66.55  | 1  |

Allene oxide synthase (*multispecies identification*)

#14 LEELLHT

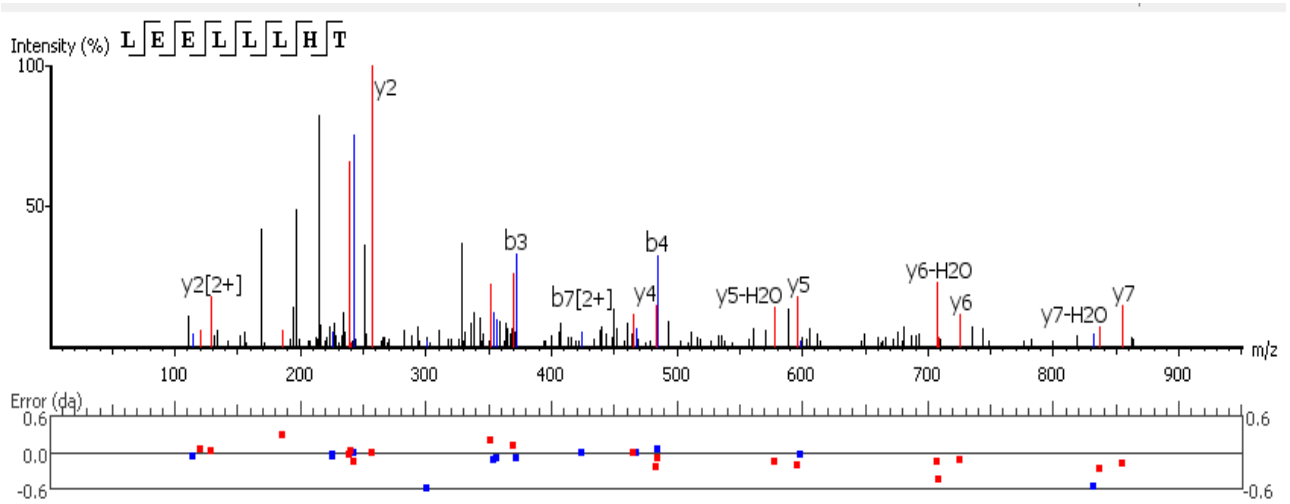

| # | b      | b-H2O  | b-NH3  | b (2+) | Seq | y      | y-H2O  | y-NH3  | y (2+) | # |
|---|--------|--------|--------|--------|-----|--------|--------|--------|--------|---|
| 1 | 114.16 | 96.08  | 97.06  | 57.55  | L   |        |        |        |        | 8 |
| 2 | 243.13 | 225.16 | 226.17 | 122.07 | E   | 854.64 | 836.72 | 837.43 | 427.73 | 7 |
| 3 | 372.28 | 354.30 | 355.15 | 186.59 | E   | 725.55 | 707.57 | 708.85 | 363.21 | 6 |
| 4 | 485.19 | 467.26 | 468.23 | 243.13 | L   | 596.59 | 578.53 | 579.35 | 298.69 | 5 |
| 5 | 598.39 | 580.33 | 581.32 | 300.26 | L   | 483.55 | 465.28 | 466.27 | 242.30 | 4 |
| 6 | 711.43 | 693.42 | 694.40 | 356.30 | L   | 370.08 | 351.97 | 353.18 | 185.30 | 3 |
| 7 | 848.49 | 830.48 | 832.03 | 424.75 | H   | 257.14 | 239.16 | 240.05 | 129.01 | 2 |
| 8 |        |        |        |        | T   | 119.98 | 102.05 | 103.04 | 60.53  | 1 |

RTM3-like protein (*multispecies identification*)

#15 LSRSMKKEAGFKLDW

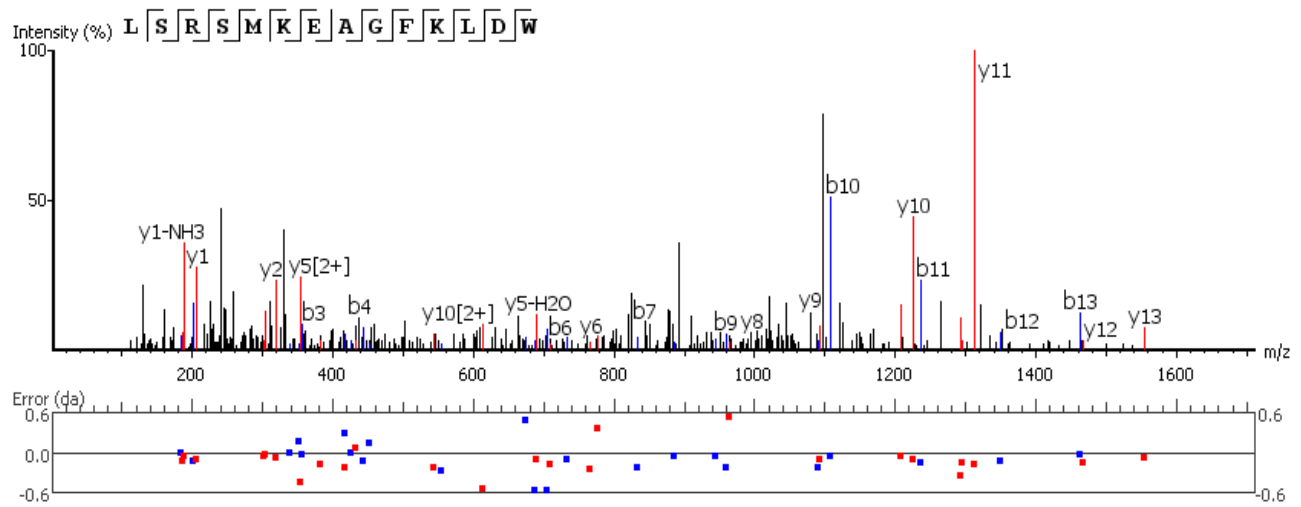

| #  | b       | b-H2O   | b-NH3   | b (2+) | Seq | y       | y-H2O   | y-NH3   | y (2+) | #  |
|----|---------|---------|---------|--------|-----|---------|---------|---------|--------|----|
| 1  | 114.09  | 96.08   | 97.06   | 57.55  | L   |         |         |         |        | 14 |
| 2  | 201.25  | 183.09  | 184.10  | 101.06 | S   | 1554.85 | 1536.76 | 1537.75 | 777.52 | 13 |
| 3  | 357.25  | 339.20  | 340.20  | 179.11 | R   | 1467.90 | 1449.73 | 1450.71 | 734.37 | 12 |
| 4  | 444.39  | 426.26  | 427.23  | 222.63 | S   | 1311.81 | 1294.00 | 1294.78 | 656.32 | 11 |
| 5  | 575.30  | 557.29  | 558.27  | 288.15 | M   | 1224.71 | 1206.60 | 1207.65 | 613.36 | 10 |
| 6  | 703.96  | 685.38  | 686.95  | 352.01 | K   | 1093.68 | 1075.56 | 1076.54 | 547.28 | 9  |
| 7  | 832.66  | 814.42  | 815.41  | 416.42 | E   | 964.93  | 947.46  | 948.45  | 483.24 | 8  |
| 8  | 903.47  | 885.52  | 886.45  | 452.08 | A   | 836.43  | 818.42  | 819.40  | 418.72 | 7  |
| 9  | 960.73  | 942.48  | 943.54  | 480.75 | G   | 765.64  | 747.38  | 748.37  | 383.37 | 6  |
| 10 | 1107.63 | 1089.55 | 1090.76 | 554.57 | F   | 708.56  | 690.48  | 691.34  | 355.14 | 5  |
| 11 | 1235.83 | 1217.65 | 1218.63 | 618.33 | K   | 561.30  | 543.29  | 544.50  | 281.15 | 4  |
| 12 | 1348.87 | 1330.73 | 1331.71 | 674.37 | L   | 433.13  | 415.20  | 416.42  | 217.10 | 3  |
| 13 | 1463.81 | 1445.76 | 1446.74 | 732.49 | D   | 320.22  | 302.17  | 303.14  | 160.56 | 2  |
| 14 |         |         |         |        | W   | 205.20  | 187.22  | 188.13  | 103.05 | 1  |



Photosystem P700 chlorophyll (*multispecies identification*)

#16 VSLPINELLD

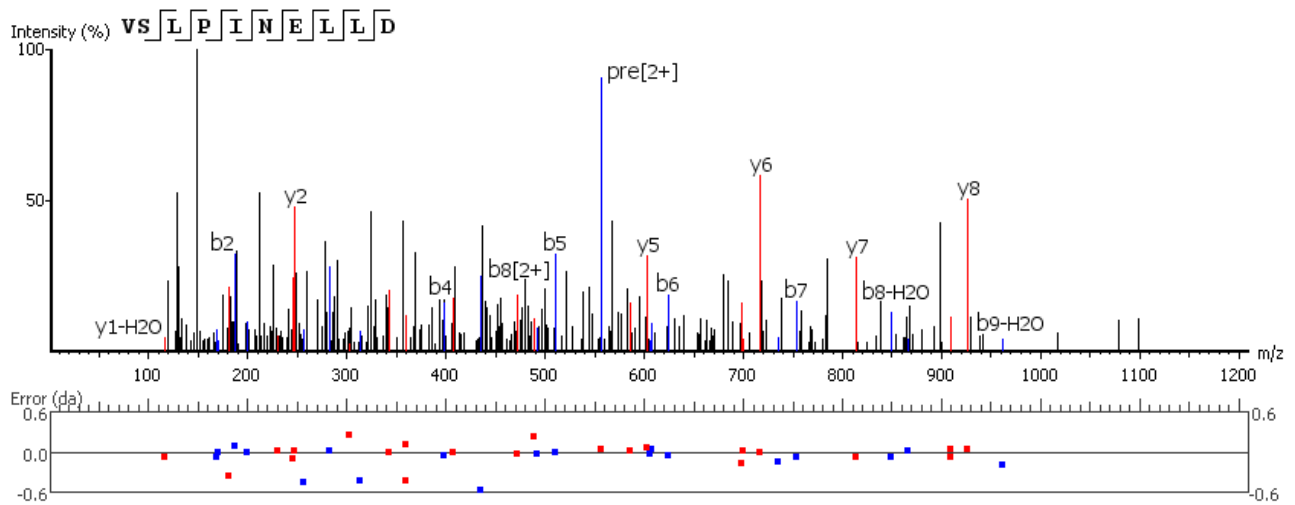

| #  | b      | b-H2O  | b-NH3  | b (2+) | Seq | y       | y-H2O  | y-NH3  | y (2+) | #  |
|----|--------|--------|--------|--------|-----|---------|--------|--------|--------|----|
| 1  | 100.08 | 82.07  | 83.05  | 50.54  | V   |         |        |        |        | 10 |
| 2  | 187.00 | 169.18 | 170.09 | 94.05  | S   | 1013.55 | 995.54 | 996.52 | 507.28 | 9  |
| 3  | 300.19 | 282.18 | 283.12 | 150.60 | L   | 926.46  | 908.60 | 909.43 | 463.76 | 8  |
| 4  | 397.31 | 379.23 | 380.22 | 199.10 | P   | 813.53  | 795.42 | 796.41 | 407.20 | 7  |
| 5  | 510.34 | 492.35 | 493.30 | 256.13 | I   | 716.38  | 698.55 | 699.32 | 359.12 | 6  |
| 6  | 624.43 | 606.39 | 607.30 | 313.11 | N   | 603.22  | 585.26 | 586.27 | 301.88 | 5  |
| 7  | 753.49 | 735.55 | 736.39 | 377.21 | E   | 489.00  | 471.24 | 472.26 | 245.24 | 4  |
| 8  | 866.47 | 848.58 | 849.47 | 434.33 | L   | 360.08  | 342.22 | 343.19 | 180.97 | 3  |
| 9  | 979.58 | 961.76 | 962.56 | 490.29 | L   | 247.09  | 229.12 | 230.06 | 124.06 | 2  |
| 10 |        |        |        |        | D   | 134.04  | 116.12 | 117.02 | 67.52  | 1  |

Unknown

#17 FVCPLNLLAE

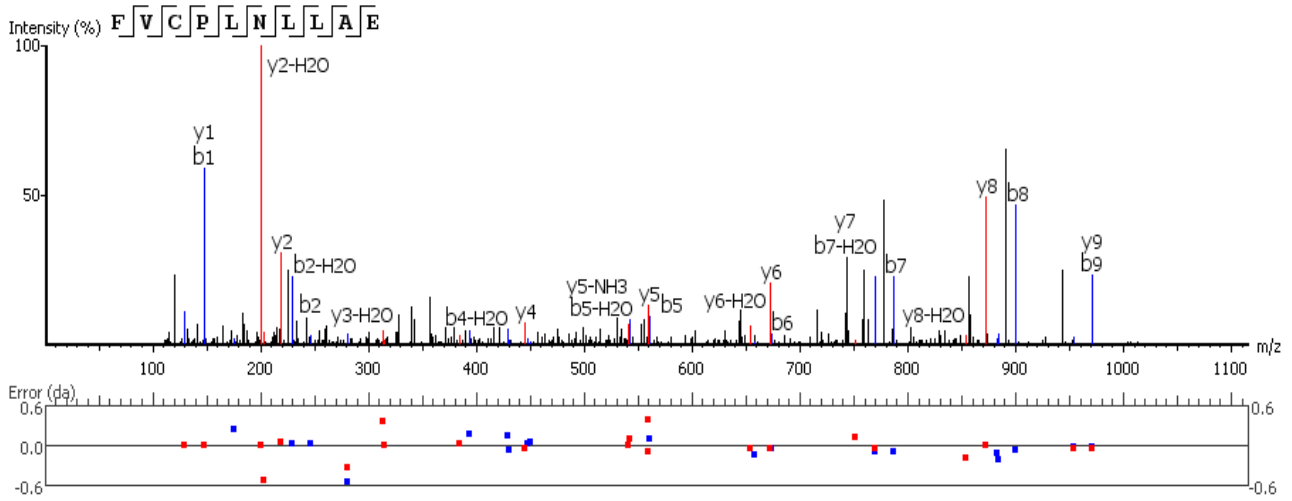

| #  | b      | b-H2O  | b-NH3  | b (2+) | Seq | y      | y-H2O  | y-NH3  | y (2+) | #  |
|----|--------|--------|--------|--------|-----|--------|--------|--------|--------|----|
| 1  | 148.06 | 130.05 | 131.05 | 74.54  | F   |        |        |        |        | 10 |
| 2  | 247.11 | 229.10 | 230.12 | 124.07 | V   | 971.58 | 953.57 | 954.50 | 486.26 | 9  |
| 3  | 350.15 | 332.14 | 333.13 | 175.33 | C   | 872.48 | 854.66 | 855.43 | 436.73 | 8  |
| 4  | 447.17 | 429.04 | 430.26 | 224.10 | P   | 769.52 | 751.31 | 752.42 | 385.17 | 7  |
| 5  | 560.19 | 542.17 | 543.26 | 281.20 | L   | 672.44 | 654.45 | 655.37 | 336.70 | 6  |
| 6  | 674.38 | 656.32 | 657.47 | 337.67 | N   | 559.41 | 541.29 | 542.17 | 280.49 | 5  |
| 7  | 787.53 | 769.52 | 770.39 | 394.03 | L   | 445.34 | 427.26 | 428.24 | 223.13 | 4  |
| 8  | 900.59 | 882.61 | 883.70 | 450.70 | L   | 332.18 | 313.79 | 315.15 | 166.59 | 3  |
| 9  | 971.58 | 953.57 | 954.51 | 486.27 | A   | 219.04 | 201.09 | 202.61 | 110.05 | 2  |
| 10 |        |        |        |        | E   | 148.06 | 130.05 | 131.03 | 74.53  | 1  |
